# Supplementary material for: Suspension stability of aluminum-based adjuvants
Source: Royal Society of Chemistry journal article supplement (doi:10.1039/d5nr00699f), 2025-01-01
Supplement: d5nr00699f1.pdf [file d5nr00699f1.pdf]

## **Suspension Stability of Aluminum-based Adjuvants**

Zhihui Liang<sup>1,2,3,6, #</sup>, Hongyang Gao<sup>1,2,3, #</sup>, Qian Ren<sup>4,5</sup>, Xin Li<sup>1,2,3</sup>, Yubin Ma<sup>1,2,3</sup>,  
Changying Xue<sup>4,5, \*</sup>, Bingbing Sun<sup>1,2,3, \*</sup>

<sup>1</sup>State Key Laboratory of Fine Chemicals, Dalian University of Technology, 2 Linggong Road, 116024, Dalian, China

<sup>2</sup>School of Chemical Engineering, Dalian University of Technology, 2 Linggong Road, 116024, Dalian, China

<sup>3</sup>Frontiers Science Center for Smart Materials Oriented Chemical Engineering, School of Chemical Engineering, Dalian University of Technology, 2 Linggong Road, 116024, Dalian, China

<sup>4</sup>MOE Key Laboratory Bio-Intelligent Manufacturing, Dalian University of Technology, 2 Linggong Road, 116024, Dalian, China

<sup>5</sup>School of Bioengineering, Dalian University of Technology, 2 Linggong Road, 116024, Dalian, China

<sup>6</sup>Department of Biomedical Engineering, The Chinese University of Hong Kong, Shatin, New Territories, Hong Kong SAR

<sup>#</sup>These authors made equal contributions to this work.

<sup>\*</sup>Corresponding authors. E-mail:

[bingbingsun@dlut.edu.cn](mailto:bingbingsun@dlut.edu.cn);

[changyingxue@dlut.edu.cn](mailto:changyingxue@dlut.edu.cn).

## Experimental results

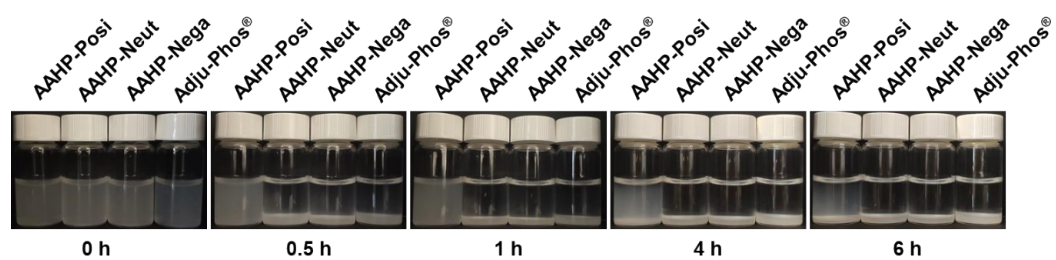

**Fig. S1.** Representative snapshots of adjuvant suspensions taken at indicated time points.  $1.1 \text{ mg mL}^{-1}$  of AAHP NPs and Adju-Phos® were suspended in saline.

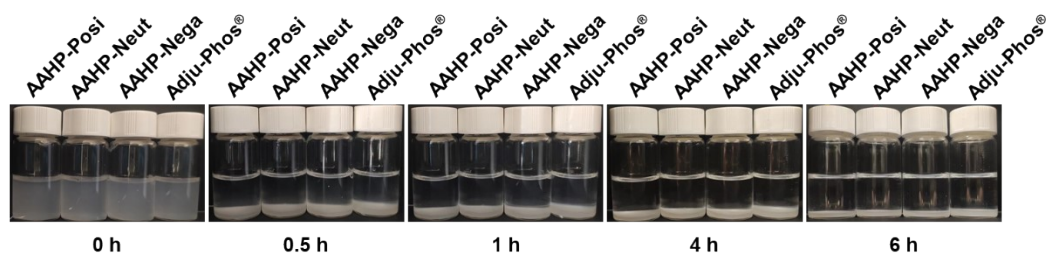

**Fig. S2.** Representative snapshots of adjuvant-antigen complexes suspensions taken at indicated time points. AAHP NPs-HPV VLP 18 in saline containing  $0.75 \text{ mg mL}^{-1}$  of Tween

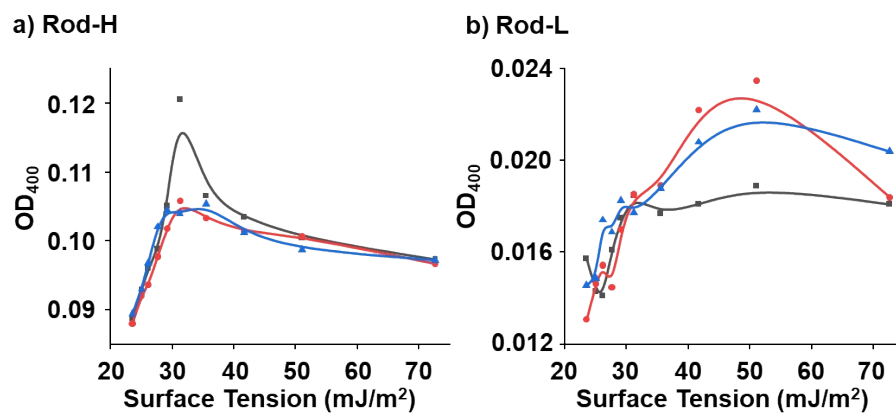

**Fig. S3.** Determination of the surface free energy of a) Rod-H and b) Rod-L using the maximum particle dispersion (MPD) method. The optical density at 400 nm ( $OD_{400}$ ) as a function of the surface tension of the probing liquids.

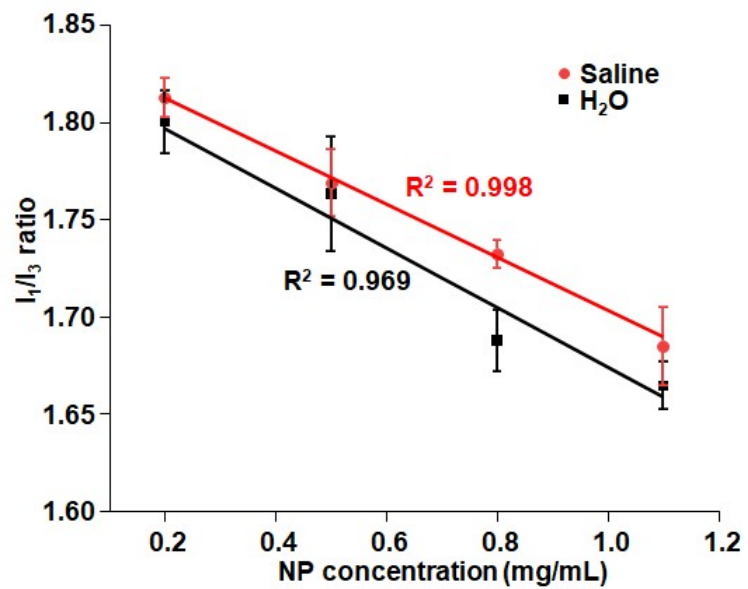

**Fig. S4.** Determination of hydrophobicity of Rod-H in H<sub>2</sub>O and saline. I<sub>1</sub>/I<sub>3</sub> ratio of pyrene as a function of NP concentration, a lower I<sub>1</sub>/I<sub>3</sub> ratio, and a larger absolute value of linear fit slope indicates that the NP is more hydrophobic.
